# Supplementary material for: The Disparities in Mental Health Between Gay and Bisexual Men Following Positive HIV Diagnosis in China: A One-Year Follow-Up Study
Source: MDPI journal article supplement (doi:10.3390/ijerph17103414), 2020-05-14
Supplement: s1 [file s1]

**Table S1.** Differences in baseline sample characteristics between participants who completed follow-up survey and those who did not.

| Characteristics         | Gay Men ( <i>n</i> = 235)  |                       | <i>p</i>                 | Bisexual Men ( <i>n</i> = 119) |                       | <i>p</i>           |
|-------------------------|----------------------------|-----------------------|--------------------------|--------------------------------|-----------------------|--------------------|
|                         | Complete ( <i>n</i> = 171) | Loss ( <i>n</i> = 64) |                          | Complete ( <i>n</i> = 87)      | Loss ( <i>n</i> = 32) |                    |
| Age                     |                            |                       |                          |                                |                       |                    |
| 18–29                   | 115 (67.3%)                | 45 (70.3%)            | 0.654 <sup>1</sup>       | 60 (69.0%)                     | 18 (56.3%)            | 0.196 <sup>1</sup> |
| ≥ 30                    | 56 (32.7%)                 | 19 (29.7%)            |                          | 27 (31.0%)                     | 14 (43.8%)            |                    |
| Marital                 |                            |                       |                          |                                |                       |                    |
| Single                  | 141 (82.5%)                | 51 (79.7%)            | 0.861 <sup>1</sup>       | 62 (71.3%)                     | 21 (65.6%)            | 0.638 <sup>1</sup> |
| Married                 | 18 (10.5%)                 | 6 (9.4%)              |                          | 19 (21.8%)                     | 8 (25%)               |                    |
| Divorce                 | 12 (7.0%)                  | 7 (10.9%)             |                          | 6 (6.9%)                       | 3 (9.4%)              |                    |
| Education background    |                            |                       |                          |                                |                       |                    |
| Senior or lower         | 70 (40.9%)                 | 27 (42.2%)            | 0.862 <sup>1</sup>       | 38 (43.7%)                     | 18 (56.3%)            | 0.223 <sup>1</sup> |
| College or higher       | 101 (59.1%)                | 37 (57.8%)            |                          | 49 (56.3%)                     | 14 (43.7%)            |                    |
| Employment              |                            |                       |                          |                                |                       |                    |
| Employed                | 111 (64.9%)                | 38 (59.4%)            | 0.466 <sup>1</sup>       | 57 (65.5%)                     | 27 (84.4%)            | 0.058 <sup>1</sup> |
| Unemployed              | 60 (35.1%)                 | 26 (40.6%)            |                          | 30 (34.5%)                     | 5 (15.6%)             |                    |
| Monthly income (RMB)    |                            |                       |                          |                                |                       |                    |
| ≤ 4000                  | 96 (56.1%)                 | 35 (54.7%)            | 0.967 <sup>1</sup>       | 54 (62.1%)                     | 14 (43.8%)            | 0.094 <sup>1</sup> |
| > 4000                  | 75 (43.9%)                 | 29 (45.3%)            |                          | 33 (37.9%)                     | 18 (56.2%)            |                    |
| Children                |                            |                       |                          |                                |                       |                    |
| With                    | 21 (12.3%)                 | 10 (15.6%)            | 0.500 <sup>1</sup>       | 21 (24.1%)                     | 8 (25.0%)             | 0.923 <sup>1</sup> |
| Without                 | 150 (87.7%)                | 54 (84.4%)            |                          | 66 (75.9%)                     | 24 (75.0%)            |                    |
| Living alone            |                            |                       |                          |                                |                       |                    |
| Yes                     | 46 (26.9%)                 | 27 (42.2%)            | <b>0.024<sup>1</sup></b> | 29 (33.3%)                     | 8 (25.0%)             | 0.384 <sup>1</sup> |
| No                      | 125 (73.1%)                | 37 (57.8%)            |                          | 58 (66.7%)                     | 24 (75.0%)            |                    |
| HIV-related symptoms    |                            |                       |                          |                                |                       |                    |
| With                    | 61 (35.7%)                 | 19 (29.7%)            | 0.389 <sup>1</sup>       | 37 (42.5%)                     | 8 (25.0%)             | 0.080 <sup>1</sup> |
| Without                 | 110 (64.3%)                | 45 (70.3%)            |                          | 50 (57.5%)                     | 24 (75.0%)            |                    |
| CD4 count (cells/mm)    |                            |                       |                          |                                |                       |                    |
| ≤ 350                   | 66 (38.6%)                 | 28 (44.4%)            | 0.418 <sup>1</sup>       | 40 (46.0%)                     | 13 (40.6%)            | 0.602 <sup>1</sup> |
| > 350                   | 105 (61.4%)                | 35 (55.6%)            |                          | 47 (54.0%)                     | 19 (59.4%)            |                    |
| PHQ-9                   | 8 (4, 13)                  | 6 (2, 10)             | 0.305 <sup>2</sup>       | 9 (4, 15)                      | 10 (5, 16)            | 0.829 <sup>2</sup> |
| GAD-7                   | 6 (3, 10)                  | 6 (2, 10)             | 0.729 <sup>2</sup>       | 7 (4, 13)                      | 7 (4, 14)             | 0.712 <sup>2</sup> |
| HIV/AIDS-related stress | 21 (14, 30)                | 21 (16, 30)           | 0.894 <sup>2</sup>       | 24 (13, 35)                    | 22 (11, 34)           | 0.907 <sup>2</sup> |
| Social stress           | 12 (7, 16)                 | 13 (8, 16)            | 0.928 <sup>2</sup>       | 12 (8, 16)                     | 12 (9, 15)            | 0.685 <sup>2</sup> |
| Emotional stress        | 6 (3, 10)                  | 5 (2, 8)              | 0.393 <sup>2</sup>       | 6 (3, 12)                      | 6 (3, 11)             | 0.755 <sup>2</sup> |
| Instrumental stress     | 4 (1, 7)                   | 4 (1, 7)              | 0.820 <sup>2</sup>       | 5 (2, 8)                       | 4 (2, 8)              | 0.808 <sup>2</sup> |
| Social support          | 28 (23, 33)                | 29 (21, 33)           | 0.627 <sup>2</sup>       | 28 (23, 32)                    | 32 (24, 35)           | 0.218 <sup>2</sup> |
| Objective support       | 13 (10, 17)                | 14 (10, 19)           | 0.285 <sup>2</sup>       | 14 (11, 19)                    | 14 (10, 20)           | 0.556 <sup>2</sup> |
| Subjective support      | 8 (6, 10)                  | 7 (5, 9)              | 0.996 <sup>2</sup>       | 8 (5, 9)                       | 8 (7, 9)              | 0.464 <sup>2</sup> |
| Support utilization     | 6 (5, 7)                   | 6 (5, 8)              | 0.843 <sup>2</sup>       | 6 (5, 7)                       | 6 (5, 8)              | 0.657 <sup>2</sup> |

<sup>1</sup> Chi-square tests; <sup>2</sup> Mann-Whitney U tests.
